# Supplementary material for: NiCo@NPC@CF nanocomposites derived from NiCo-MOF/cotton for high-performance electromagnetic wave absorption
Source: Royal Society of Chemistry journal article supplement (doi:10.1039/d2tc00965j), 2022-01-01
Supplement: d2tc00965j1.pdf [file d2tc00965j1.pdf]

## Supporting Information

### **NiCo@NPC@CF nanocomposites derived from NiCo-MOF/cotton for electromagnetic wave absorption**

*Hongdu Jin<sup>a</sup> & Hui-Min Wen<sup>\*a</sup>, Qu Hong<sup>a</sup>, Jun Lin<sup>a</sup>, Jun Li<sup>a</sup> and Jun Hu<sup>\*a</sup>*

<sup>a</sup> College of Chemical Engineering, Zhejiang University of Technology, Hangzhou  
310014, P.R. China

E-mail: huiminwen@zjut.edu.cn; hjzjut@zjut.edu.cn.

**Table S1** The dielectric loss of samples

| Sample          | Frequency<br>(GHz) <sup>a</sup> | $\epsilon_c''$ | $\epsilon_p''$ | $\epsilon_c''/\epsilon_p''$ |
|-----------------|---------------------------------|----------------|----------------|-----------------------------|
| NiCo@NPC@CF-600 | 6.08                            | 0.391          | 1.496          | 0.261                       |
| NiCo@NPC@CF-700 | 6.72                            | 0.354          | 2.627          | 0.135                       |
| NiCo@NPC@CF-800 | 9.36                            | 0.254          | 9.230          | 0.028                       |

<sup>a</sup> Frequency at RLmin.

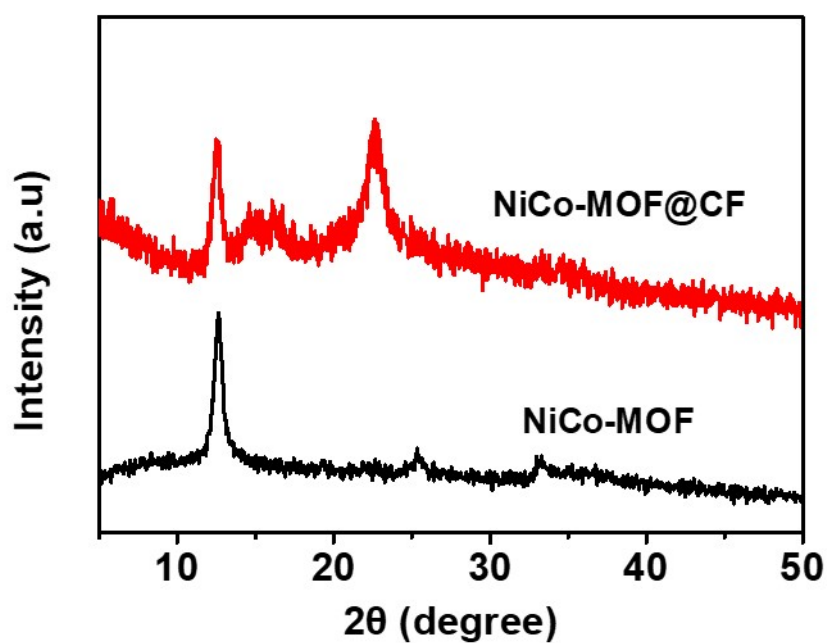

**Fig. S1.** XRD patterns of NiCo-MOF and NiCo-MOF@CF.

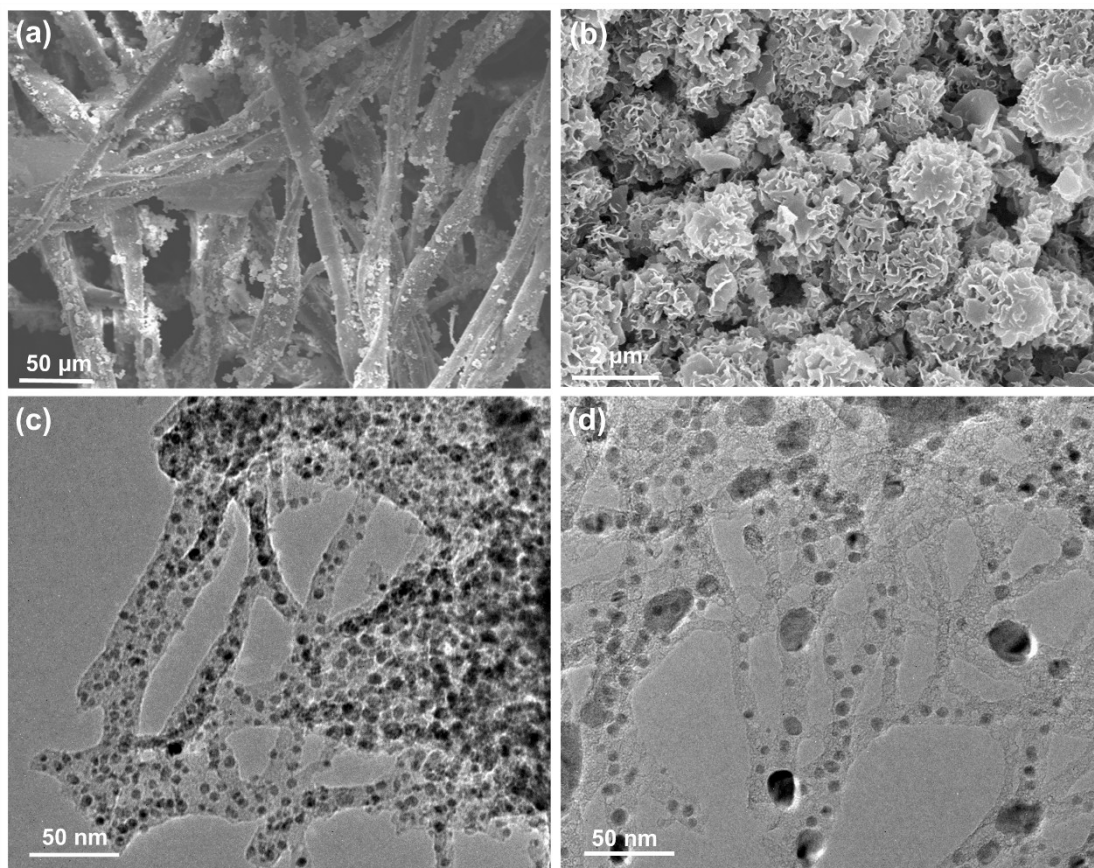

**Fig. S2.** SEM images for NiCo-MOF coated cotton fiber precursor NiCo-MOF@CF (a,b), TEM images for NiCo@NPC@CF-600 (c) and NiCo@NPC@CF-800 (d).

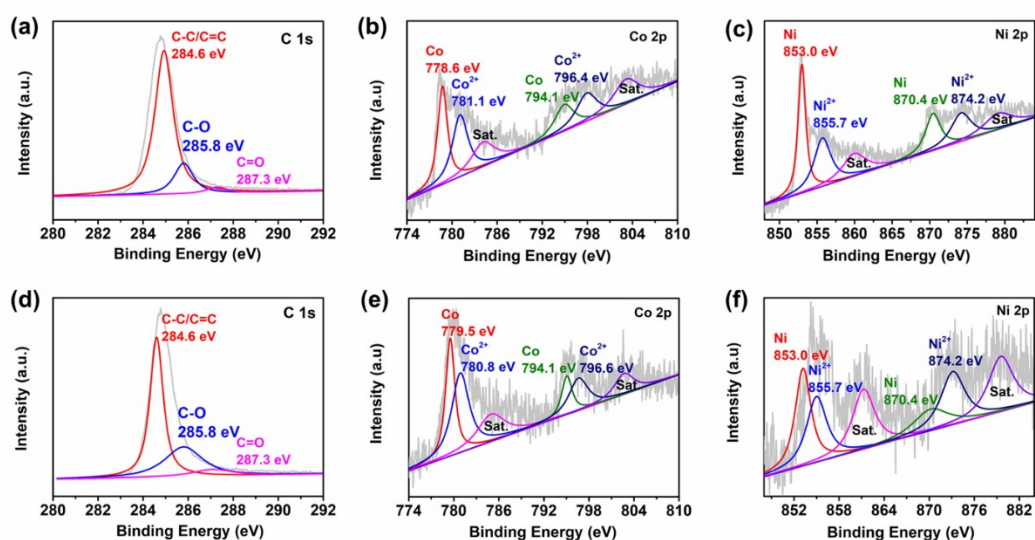

**Fig. S3.** XPS spectra of for NiCo@NPC@CF-600: (a) C 1s, (b) Co 2p, (c) Ni 2p, and for NiCo@NPC@CF-800: (d) C 1s, (e) Co 2p, (f) Ni 2p.

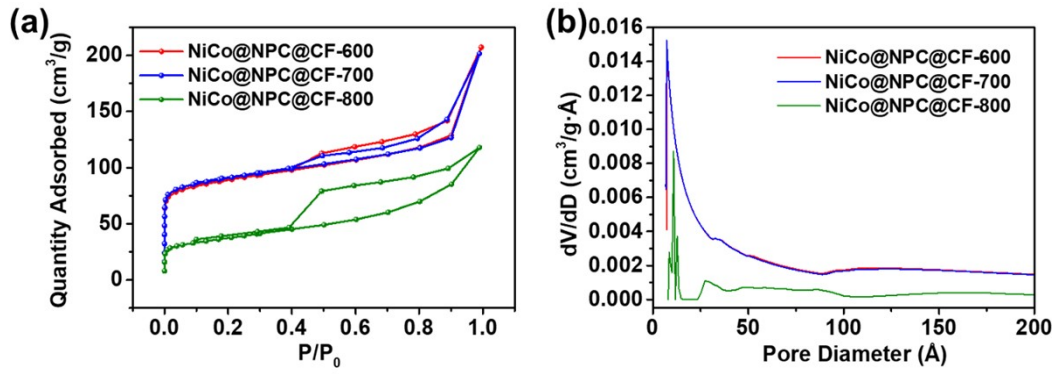

**Fig. S4.** (a)  $N_2$  adsorption-desorption isotherms, and (b) Pore-size distributions derived from the adsorption branch by the BJH method of NiCo@NPC@CF-600, NiCo@NPC@CF-700 and NiCo@NPC@CF-800.

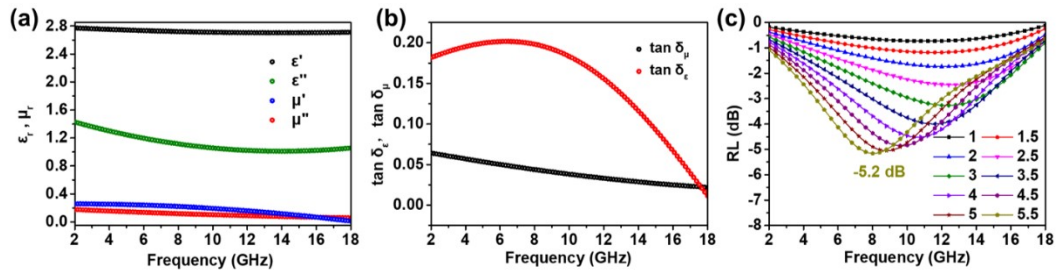

**Fig. S5.** Complex permittivity and permeability (a), dielectric loss tangent and magnetic loss tangent (b) and Reflection loss curves (c) for NiCo@NPC-700.

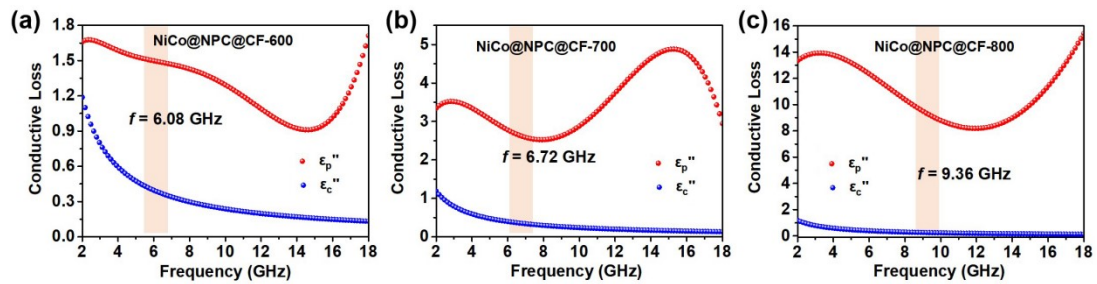

**Fig. S6.** Plots of  $\epsilon_c''$  and  $\epsilon_p''$  vs frequency: (a) NiCo@NPC@CF-600, (b) NiCo@NPC@CF-700 and (c) NiCo@NPC@CF-800.

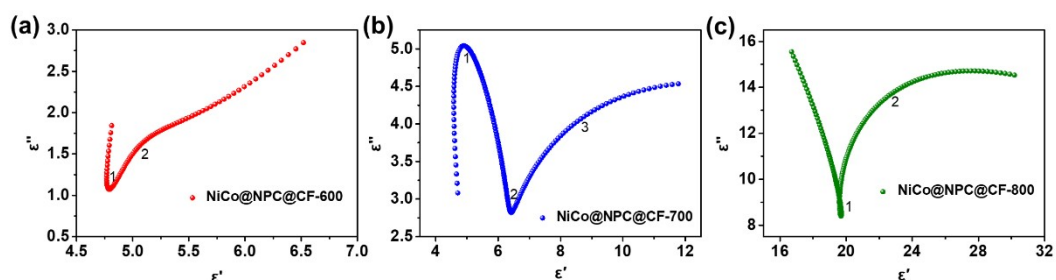

**Fig. S7.** The cole-cole plots of (a) NiCo@NPC@CF-600, (b) NiCo@NPC@CF-700 and (c) NiCo@NPC@CF-800.

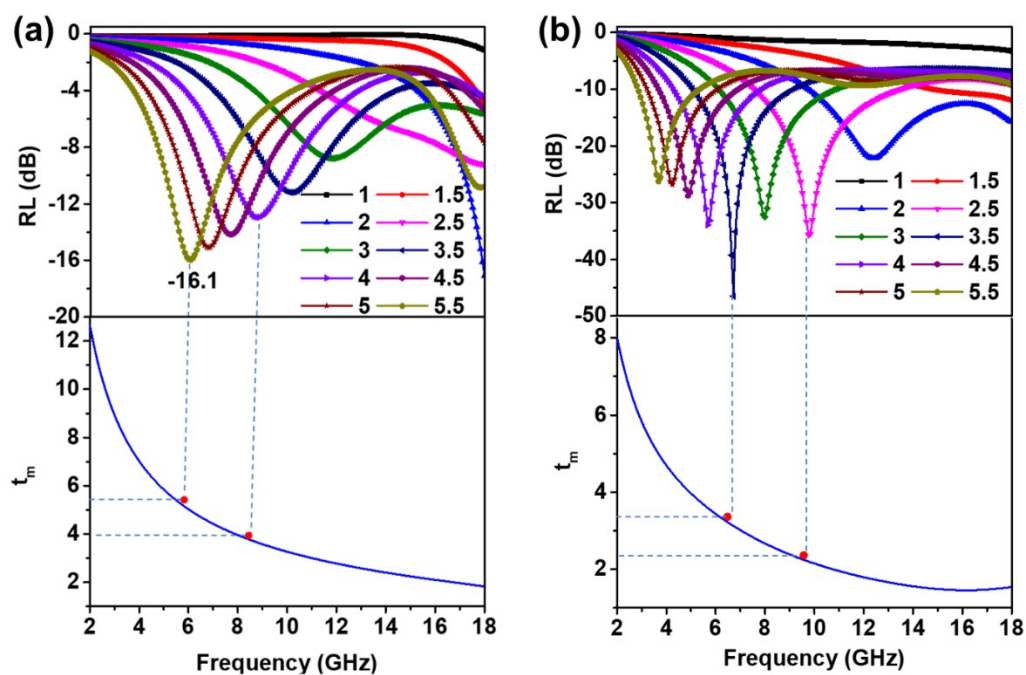

**Fig. S8.** The relationship between thickness and peak frequency of (a) NiCo@NPC@CF-600 and (b) NiCo@NPC@CF-700 derived from the quarter-wavelength cancellation model.

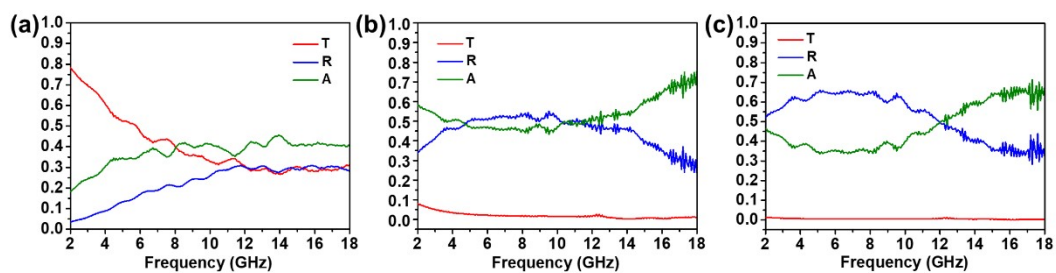

**Fig. S9.** The corresponding R, A, and T values of (a) NiCo@NPC@CF-600, (b) NiCo@NPC@CF-700 and (c) NiCo@NPC@CF-800.
